# Supplementary material for: The Heavy Mineral Map of Australia: Vision and Pilot Project
Source: Preprints.org preprint supplement (doi:10.20944/preprints202206.0273.v1), 2022-06-20
Supplement: Supplementary file 1 [file supplementary]

## Sheet: TabSM2
Sample	WR0090	WR0115	WR0453	WR0602	WR0755	WR1046	WR1052	WR1067	WR1337	WR1353
SampleID	2007190090	2007190115	2007190453	2007190602	2007190755	2007191046	2007191052	2007191067	2007191337	2007191353
Type	WR	WR	WR	WR	WR	WR	WR	WR	WR	WR
Lat (dd)	-35.4773	-31.7149	-16.9931	-31.33	-33.0937	-15.7067	-20.9017	-31.7749	-12.6557	-30.6985
Long (dd)	141.99	138.216	144.302	118.011	147.059	142.619	129.349	145.227	135.311	115.585
Mineral abundance (vol%)
Aluminosilicate polymorph	0.014144	0.000450306	0.0370908	0.00438836	0.0104814	0.0583473	0.13512	0.004153	0.00104025	0.0899095
Amphibole-Actinolite	4.63737e-05	0.0228223	0.01463	0.00138515	0.00141935	0	0.000390486	4.19495e-05	3.28499e-05	0.000782657
Amphibole-Ferritschermakite	0.00159216	0.990203	0.00690786	0.000600641	0.030867	0	0.00335574	0.00368107	1.095e-05	0.000439387
Amphibole-Fluoropargasite	0.000139121	0.0372219	0.125957	0.0273966	0.0540757	9.30209e-05	0.00222089	0.00132141	5.47499e-05	0.000521772
Amphibole-Katophorite	4.63737e-05	0.00502501	0.00861787	0.000674189	0.00224601	3.48828e-05	0.000524715	8.38991e-05	1.095e-05	8.2385e-05
Amphibole-Magnesiogedrite	0.000525569	0.113068	0.0613429	0.000563867	0.00210563	0.000151159	0.00981096	0.000859965	0.00558449	0.000109847
Amphibole-Potassic-magnesiohastingsite	0.00301429	0.0953626	0.718282	0.0373869	0.0660232	0.000523242	0.00995739	0.00265331	5.47499e-05	0.00208709
Anorthoclase	0.0686795	0.858182	2.88879	0.715695	3.4251	0.0264761	0.0875787	1.16398	0.141222	0.145561
Apatite	9.27475e-05	0.00709232	0.00730144	0.0150283	0.00820416	0.000116276	0	9.43864e-05	0	4.11925e-05
Berthierine	0.000154579	0.00348987	0.0318522	0.00343224	0.0028387	0.000639518	0.0109336	0.00317768	0.00957028	0.00273244
Calcite	0.000850185	1.29977	0.00285	3.6774e-05	0.000686279	0.000127904	0.0382066	9.43864e-05	0.0020586	0.00016477
Cassiterite	0	0	0.00101786	0	0	0	1.22027e-05	0	0	0
Chlorite (Clinochlore-Chamosite)	0.000231869	0.114869	0.0166657	2.4516e-05	0.00276072	0	0.0108726	0.000377546	2.19e-05	9.61158e-05
Chromite	0	0.000358198	5.42858e-05	0.000220644	0.00191846	5.8138e-05	0.000146432	0.000220235	3.28499e-05	0.000247155
Corundum	1.54579e-05	0.000419604	0.000108572	0.000294192	0.000265153	0.00116276	0.000109824	0.000104874	8.75998e-05	0.00152412
Dolomite (Dolomite/Ankerite)	0	0.39452	0	0	0	0	0.0107262	0	0	0
Feldspar (Albite-Anorthite)	0.16945	1.46373	6.47886	5.69321	3.42035	0.0730446	0.14631	1.17581	0.0842382	0.237818
Florencite	3.09158e-05	0.0023027	0.000977144	0.000453546	0.00564621	0.000104648	0.000695553	0.00118507	0.00130305	0.000137308
Garnet (Almandine)	0.00255056	0.136811	0.358069	0.0393359	0.0636056	0.00911604	0.175706	0.0998504	0.0490997	0.0297822
Garnet (Andradite)	0	0.00137139	0.0357336	0	0.001123	0	0	0	0	0
Garnet (Grossular)	0	0.00553672	0.0272515	0	0.00138816	0	0	0	0	0
Garnet (Pyrope)	0.000448279	0.111308	0.00200857	0.000110322	0.000296348	0	0.000341675	0.000335596	0	4.11925e-05
Garnet (Spessartine)	0.000139121	6.14054e-05	0.00712501	0.000625157	0.00680041	8.13933e-05	0.0013667	0.00270574	0.00012045	0
Harkerite	1.54579e-05	0.230618	1.35714e-05	0	0	0	0.0164858	2.09748e-05	0	0
Hematite/Magnetite	0.00166945	0.280981	0.114258	0.017627	0.034002	0.00716261	0.0325934	0.0136126	0.0566661	0.0100647
Huttonite	0	0	8.14287e-05	0	0	0	0.000207446	0	0	0
Ilmenite	0.0700553	0.0363213	0.088228	0.0625035	0.130549	0.0358479	0.114791	0.0452321	0.236684	0.28394
Kaolinite	0.00537935	0.0195065	0.17062	0.256278	0.0274356	0.0109067	0.163589	0.0374085	0.0371204	0.0261984
Kleberite	0	0.000880144	0	0.000269676	0	0.000151159	0.000244054	0	0.00674519	0.00726361
Lourenswalsite	0.00335437	0.0396167	0.0276857	0.0150283	0.0483515	0.0144415	0.00684571	0.0186361	0.0140707	0.0127422
Mica (Biotite)	0.0111297	1.71922	0.887274	0.0169405	0.381228	0.00247668	0.0750953	0.191447	0.0462636	0.00899369
Mica (Muscovite)	0.0175756	1.36084	2.25674	0.348973	0.993046	0.0176275	0.225298	0.309189	0.477342	0.0462317
Monazite	6.18316e-05	0.00441096	0.0108979	0.000232902	0.00302587	0.00817421	0.00625998	0.000104874	0.00381059	0.00584933
Orthoclase	1.16056	6.00752	20.4398	25.9499	3.2729	0.372921	3.68538	1.48916	1.667	5.61305
Osumilite-(Fe)	0.40291	6.79241	2.77607	1.02153	9.51798	0.150775	4.25011	36.0601	0.256821	0.658517
Pseudobrookite	0	0.0352672	0.00143857	0.000465804	0.00561501	0	0.00312389	0.00284208	0.00016425	9.61158e-05
Pseudorutile/Leucoxene	1.54579e-05	0.0133454	0.0162857	0.00695028	0.0348443	0.00679052	0.0112265	0.0116515	0.00917608	0.0108199
Pumpellyite	0.0169882	1.97564	0.261318	0.0104438	0.514335	0.000116276	0.0165834	0.021625	0.00948268	0.0014692
Punkaruaivite	0.011748	0.0480395	0.0345258	0.0215373	0.0833362	0.051708	0.0168275	0.0294276	0.0263456	0.0138544
Pyrite	0.260899	0.588243	1.30141	1.25838	1.79315	1.28593	0.467826	2.27614	0.796304	3.64603
Pyroxene (Enstatite-Ferrosilite)	0.000958391	0.0448771	0.00529286	0.00442513	0.000779863	0.000197669	0.000780972	4.19495e-05	0.000525599	0.000590426
Pyroxene (Augite)	9.27475e-05	0.00176029	0.00632429	1.2258e-05	0.00137256	4.65104e-05	0.00131789	0	1.095e-05	0.000123577
Pyroxene (Diopside-Hedenbergite)	0.000850185	0.0245315	0.0221893	0.000649673	0.0028699	2.32552e-05	0.000463702	0.000545344	2.19e-05	0.000672811
Pyroxene (Jadeite)	0.056576	1.43083	2.93734	1.42494	2.85984	0.038313	0.019146	0.404331	0.125093	0.145959
Quartz	97.1133	63.2404	54.4071	60.9516	65.978	96.7173	84.1282	49.6127	94.3178	86.6611
Rutile	0.0360015	0.102834	0.0733401	0.0372275	0.115794	0.172844	0.0723497	0.0664166	0.326649	0.305346
Spinel	0	0.000562883	0	0	0	0	0	0	0	0
Spodumene	0.021131	0.0926505	0.26235	0.132497	0.136804	0.0497894	0.116194	0.227702	0.0810408	0.0125088
Staurolite	0	0	0.000135714	0.00030645	0	0.000813933	0.00488107	0	0	0.0107924
Titanite	0	0.0041858	0.0117257	6.12899e-05	0.0106529	0	0	0.000734117	4.37999e-05	2.74617e-05
Tourmaline (Schorl-Dravite)	0.0622645	0.135552	0.310528	0.257785	0.0850987	0.127799	0.793479	0.206371	0.132232	0.0830578
Tourmaline (Uvite-Feruvite)	0.00221048	0.77814	0.189769	0.00224321	0.051315	0.0134299	0.264945	0.00919743	0.0344377	0.0159278
Wollastonite	0	0.540583	9.50001e-05	0	0	0.000209297	0.0156072	2.09748e-05	0.00012045	4.11925e-05
Xenotime-(Y)	3.09158e-05	0.00257903	0.00393572	0.000379998	0.000374334	0.000151159	0.000475905	5.24369e-05	0.000624149	4.11925e-05
Zircon	0.00193224	0.020448	0.0597008	0.0116328	0.0266089	0.0588241	0.0405739	0.019129	0.164074	0.133972
Unclassified	0.476135	8.52228	2.42402	1.62927	6.69344	0.659064	4.74271	6.45671	0.85896	1.76095
The rest	0.00404997	0.240955	0.0680472	0.0190612	0.0890448	0.0261272	0.0619652	0.028704	0.0197976	0.0116712
Total	100	100	100	100	100	100	100	100	100	100
