# Supplementary material for: The Heavy Mineral Map of Australia: Vision and Pilot Project
Source: Preprints.org preprint supplement (doi:10.20944/preprints202206.0273.v1), 2022-06-20
Supplement: Supplementary file 2 [file Supplementary TableS1.xlsx]

## Sheet: Sheet1
Mineral	Formula	Ave SG	Environment/Rocks*
Actinolite	Ca2(Mg,Fe++)5Si8O22(OH)2	3.04	Met
Albite	NaAlSi3O8	2.62	Mag, Pegm
Almandine	Fe++3Al2(SiO4)3	4.19	Met, Pegm
Andradite	Ca3Fe+++2(SiO4)3	3.9	Ign, Met
Ankerite	Ca(Fe++,Mg,Mn)(CO3)2	3.05	Gangue mineral to many ores, Sed
Anorthite	CaAl2Si2O8	2.73	Mag, Met
Bannisterite	KCa(Mn,Fe++,Zn,Mg)21(Si,Al)32O76(OH)16•4-12(H2O)	2.83	Met Mn-Zn ores
Cassiterite	SnO2	6.9	Granitic Pegm; Alluv placer
Chromite	Fe++Cr2O4	4.79	Umaf Intrus
Cordierite	Mg2Al4Si5O18	2.65	Mag, Met, Pegm
Corundum	Al2O3	4.05	Contact & Reg Met
Enstatite	Mg2Si2O6	3.2	Maf Mag
Ferrosaponite	Ca0.3(Fe++,Mg,Fe+++)3(Si,Al)4O10(OH)2•4(H2O)	2.49	Hydroth
Hematite/Magnetite	Fe2O3/Fe++Fe+++2O4	5.3/5.15	Mag, Hydroth, Met, Sed/Ign, Met
Ilmenite	Fe++TiO3	4.72	Ign, Met; 'Black sands' Sed
Kaersutite	NaCa2(Mg4Ti)Si6Al2O23(OH)2	3.24	Basalt/Int Intrus & Extrus
Kaolinite	Al2Si2O5(OH)4	2.6	Weathering
Kyanite	Al2SiO5	3.61	Met peri-Al Sed
MagnesioChromite	MgCr2O4	4.2	Umaf Intrus
Monazite	(Ce,La,Nd,Th)PO4	5.15	Granitic Pegm
Muscovite	KAl2(Si3Al)O10(OH,F)2	2.82	Gra, Pegm
Orthoclase	KAlSi3O8	2.56	Intrus/Extrus Ign; Met
Pigeonite	(Mg,Fe++,Ca)(Mg,Fe++)Si2O6	3.38	Volc, Maf Intrus, Met iron Fm
Plagioclase	(Na,Ca)(Si,Al)4O8	2.68	Ign, Met
Pyrite	FeS2	5.01	Sed, Mag, Met, Hydroth
Pyrope	Mg3Al2(SiO4)3	3.74	Umaf Intrus
Rutile	TiO2	4.25	HTP Ign, Sed
Schorl	NaFe++3Al6(BO3)3Si6O18(OH)4	3.15	Ign, greis, skarn, quartz vein
Schorlomite	Ca3(Ti,Fe+++,Al)2[(Si,Fe+++,Fe++)O4]3	3.84	Alk Ign
Spinel	MgAl2O4	3.64	Met carb, v low Si/Alk Ign
Titanite	CaTiSiO5	3.48	Int/Fel Intrus
Tourmaline	(Ca,Na,K,☐) (Y)3 (Z)6 ((Si,Al,B)6O18) (BO3)3 (OH,O)3 (OH,F,O), where	3.05	Ign/Met
	Y = Li,Mg,Fe++,Fe+++,Mn++,Al,Cr+++,V+++; Z = Mg,Al,Fe+++,V+++,Cr+++
Tschermakite	☐Ca2(Mg3AlFe+++)Si6Al2O22(OH)2	3.24	HG Met
UlvoSpinel	TiFe++2O4	4.91	Ti magnetite iron ore
Zircon	ZrSiO4	4.65	Mag, Met, Pegm, Alluv
* Alk = Alkaline; Alluv = Alluvium; Carb = Carbonate; Extrus = Extrusive, Extrusion; Fm = Formation; Greis = Greisen; HG = High Grade; HTP = High Temperature and Pressure; Hydroth = Hydrothermal; Ign = Igneous; Int = Intermediate; Intrus = Intrusive, Intrusion; Maf = Mafic; Mag = Magmatic; Met = Metamorphic, Metamorphism; Pegm = Pegmatite; Reg = Regional; Sed = Sedimentary, Sediment; Si = Silica;…
