# Supplementary material for: The Heavy Mineral Map of Australia: Vision and Pilot Project
Source: Preprints.org preprint supplement (doi:10.20944/preprints202206.0273.v1), 2022-06-20
Supplement: Supplementary file 4 [file Supplementary TableS3.xlsx]

## Sheet: TabSM3
Sample	H0090	H0115	H0453	H0602	H0755	H1046	H1052	H1067	H1337	H1353
SampleID	2007190090	2007190115	2007190453	2007190602	2007190755	2007191046	2007191052	2007191067	2007191337	2007191353
Type	HMC	HMC	HMC	HMC	HMC	HMC	HMC	HMC	HMC	HMC
Lat (dd)	-35.4773	-31.7149	-16.9931	-31.33	-33.0937	-15.7067	-20.9017	-31.7749	-12.6557	-30.6985
Long (dd)	141.99	138.216	144.302	118.011	147.059	142.619	129.349	145.227	135.311	115.585
Mineral abundance (vol%)
Aluminosilicate polymorph	8.95156	0.027576	1.76675	0.498707	0.126256	4.43149	6.27075	1.34476	0.0648189	3.46706
Amphibole-Actinolite	0	0.0209793	0.171093	0.0720292	0.0256973	0.000586072	0.00048515	0.00106839	0.000126886	0.000319488
Amphibole-Ferritschermakite	0.000664295	0.448867	0.0291911	0.011741	0.071905	0.000155791	0.000158777	0.00378235	0.00060104	3.11696e-05
Amphibole-Fluoropargasite	0.0188558	0.129257	1.94195	4.06784	0.229294	0.00199561	0.00254924	0.0132014	0.000788031	0.000272734
Amphibole-Katophorite	0	0.0614075	0.332444	0.34217	0.0111668	0.000415443	0.0124375	0.00170697	0.0015026	0.00216629
Amphibole-Magnesiogedrite	0.0798943	0.214642	0.0272622	0.00603949	0.00804103	0.00620197	0.0280152	0.0207047	0.0126285	0.00384945
Amphibole-Potassic-magnesiohastingsite	0.00309153	0.156295	11.4789	10.202	0.426367	9.64422e-05	0.0763274	0.0438163	0.000707892	0.000841579
Anorthoclase	0.0116124	1.14458	0.698524	0.0945772	1.65035	0.0134722	0.00680975	0.0400463	0.01924	0.005743
Apatite	0.00215896	0.081146	0.115813	0.148274	0.00831284	0.00120924	0.000837987	0.00175609	0.000494189	0.0119925
Berthierine	0.000715395	0.0177739	0.109067	0.268362	0.00824489	0.00133535	0.255533	0.0848082	0.136737	0.00593781
Calcite	0.0465262	1.35433	0.00756444	0.181905	0.0137717	0.02348	0.0146956	0.0123786	0.0204087	0.0879606
Cassiterite	0	0	0.158329	0.000960626	0	0.00383543	0	0	0	0
Chlorite (Clinochlore-Chamosite)	0.000204399	0.278293	0.0421511	0.000960626	0.00293328	0.000511885	0.00109379	0.00176837	0.000233738	0
Chromite	0.411531	0.00314327	0.0228444	0.0666123	0.0425382	0.149715	0.0631313	0.499528	0.0130359	0.069368
Corundum	0.126076	0.00143722	0.0234933	0.0729364	0.00592318	0.0242515	0.151482	0.0552616	0.00351943	0.185755
Dolomite (Dolomite/Ankerite)	0	0.695304	0.000595555	0.00202799	2.26508e-05	0	0	0	0	0
Feldspar (Albite-Anorthite)	0.0360763	1.93893	1.50655	0.848758	2.35931	0.0274638	0.0274154	0.0779435	0.0324963	0.0124912
Florencite	0.0732896	0.0347207	0.0286311	0.0461101	0.00172146	0.0460771	0.0357335	0.112378	0.0872844	0.0128653
Garnet (Almandine)	0.0668	0.447213	1.30846	0.789261	0.195182	0.016818	1.87998	0.700386	0.167804	0.015951
Garnet (Andradite)	0	0.02922	1.00773	0.000177894	0.00742946	0	0.000132314	0.00229643	0	0
Garnet (Grossular)	0.0041263	0.0179601	1.88107	0.0110205	0.0173165	0	0.0015172	0.00873134	0	0
Garnet (Pyrope)	0.0035131	0.222603	0.00487111	0.00756938	0.00159688	0.000905073	0.00107615	0.00471566	0.00393348	0.000155848
Garnet (Spessartine)	0.108331	0.00920233	0.186347	0.0730076	0.0393331	1.48373e-05	0.000582181	0.0429321	0.000173634	3.11696e-05
Harkerite	0	0.222707	2.66667e-05	0.00121857	0.000317111	0	0	0	0	3.11696e-05
Hematite/Magnetite	0.0164413	10.4824	1.83307	2.66028	0.476527	0.0149189	5.26746	1.70917	0.657111	0.0378711
Huttonite	1.27749e-05	1.03397e-05	0.123075	0.0327324	0.000192532	0.00767828	0.017536	0.00305781	0.00112194	0.000802617
Ilmenite	18.9194	1.79212	26.1732	36.6952	3.34855	18.8	42.6191	33.3014	24.4676	31.9589
Kaolinite	0.0838162	0.0366129	0.0999466	0.141408	0.0246667	0.0229161	0.102667	0.0236151	0.0157072	0.0153744
Kleberite	0.0786551	0.020576	0.0201955	0.00879684	0.0084261	0.00436957	0.0292943	0.0386217	0.0240884	0.262916
Lourenswalsite	0.340898	0.193528	0.356258	0.461101	0.206564	0.514103	0.335186	0.814225	0.357465	0.0908049
Mica (Biotite)	0.00554431	2.22005	0.989173	0.0587316	0.249861	0.00673611	0.0768302	0.202663	0.0513823	0.00121561
Mica (Muscovite)	0.0378904	1.72717	1.871	0.0779886	1.0602	0.0638966	0.0343663	0.141715	0.275751	0.00762097
Monazite	0.00224838	0.0672908	0.279306	0.983859	0.0524592	1.90203	0.665609	0.39555	2.15843	1.32717
Orthoclase	0.00255498	4.26377	2.35232	1.71667	2.71204	0.00290068	0.039059	0.0307009	0.0269466	0.0931738
Osumilite-(Fe)	0.354542	8.76666	0.940764	0.517404	2.10692	0.148365	1.82881	2.81091	0.212354	0.113473
Pseudobrookite	0.00176294	1.43979	0.0955022	0.106238	0.121329	0.00116472	1.84636	1.27611	0.0209696	0.000677939
Pseudorutile/Leucoxene	0.289058	0.19175	0.727688	0.950922	0.42955	1.17102	1.16869	2.13638	0.488058	0.36883
Pumpellyite	0.480541	2.17925	7.95131	1.51161	6.88917	0.011855	0.0192296	0.917036	0.289348	0.0120315
Punkaruaivite	1.19843	0.143587	0.397644	0.181959	0.29138	1.52362	0.142211	0.832928	0.271563	0.0441907
Pyrite	1.41261	0.532236	0.428551	0.874703	3.00181	1.4627	0.957749	2.61993	1.16416	0.767552
Pyroxene (Enstatite-Ferrosilite)	0.00070262	0.0565065	0.0821599	0.825898	0.00236701	0.0123298	0.00169362	0.0105366	0.000647788	0.00496376
Pyroxene (Augite)	0	0.00880943	0.115271	0.0280805	0.0148476	3.70931e-05	0.0230667	0.00034385	0.000654466	0.000241564
Pyroxene (Diopside-Hedenbergite)	0.000178849	0.037316	0.187822	0.168456	0.0780093	0	0.00219641	0.0198205	0.0010418	0.00582092
Pyroxene (Jadeite)	0.00398577	2.94762	0.986586	0.362014	2.39365	0.000178047	0.00144663	0.0336973	0.00442766	0.00335853
Quartz	1.67726	39.6098	17.1884	6.76288	62.593	1.75871	0.816923	3.00082	1.66541	0.885638
Rutile	16.0129	1.94326	2.55824	12.4203	2.02468	37.3599	7.90863	19.6685	20.0557	24.4095
Spinel	0.461468	0	0.0390044	0.00214362	0.0221751	0.00124633	8.82092e-06	0.0253589	0	0.220533
Spodumene	0.0257414	0.0705581	0.0929955	0.0193459	0.0559928	0.00796019	0.0169009	0.0102418	0.00651795	0.00257929
Staurolite	3.79881	0.00113737	0.00635555	0.0218187	0.0191739	0.177602	0.117618	0.437721	0.00854145	1.18233
Titanite	5.10996e-05	0.15522	0.590737	0.0176382	0.200369	0.000319001	0.00796529	0.0374305	0	0.000685731
Tourmaline (Schorl-Dravite)	26.668	0.724761	1.38035	0.529341	0.502406	1.79865	7.55667	3.75983	2.31403	0.818241
Tourmaline (Uvite-Feruvite)	6.81043	0.732506	0.402409	0.666612	0.182305	0.433441	1.82469	1.11297	0.909561	0.583168
Wollastonite	5.10996e-05	0.388556	0.000186667	0.00163662	7.92778e-05	0	0	0	5.34258e-05	0.000148056
Xenotime-(Y)	0.00725615	0.0268729	0.21112	0.259725	0.0386423	0.708924	0.237988	0.0815293	0.265426	0.086145
Zircon	9.8987	1.52345	5.61059	10.1859	1.08864	25.4988	15.2418	18.1985	42.2262	31.7554
Unclassified	1.34474	9.78428	2.56152	2.43169	4.26426	1.72846	2.13644	2.99653	1.38874	0.922893
The rest	0.120212	0.374907	0.497644	0.502639	0.28677	0.105055	0.124984	0.278248	0.104427	0.132814
Total	100	100	100	100	100	100	100	100	100	100
